# Supplementary material for: Improving the thermocline calculation over the global ocean
Source: Copernicus journal article supplement (doi:10.5194/egusphere-2022-788), 2022-08-29
Supplement: Supplementary file [file egusphere-2022-788-RC1-supplement.pdf]

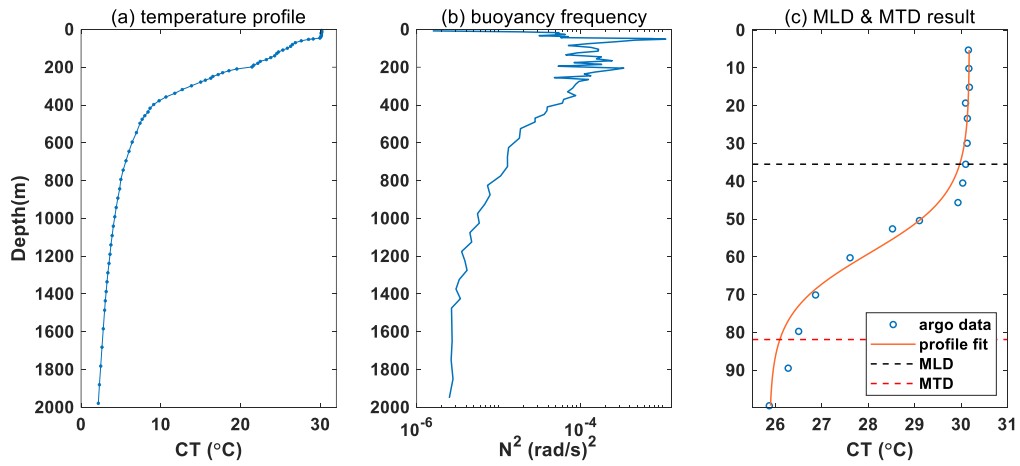

Figure. Example ARGO data of no. 2902688\_104 (date: 2019/07/26, position: 127.98°E, 15.65°N), (a) conservative temperature, (b) buoyancy frequency profile and (c) MLD and MTD calculated by the provided code.
